# Supplementary material for: Technical note: Improved synthetic routes to cis - and trans -(2-methyloxirane-2,3-diyl)dimethanol ( cis - and trans - β -isoprene epoxydiol)
Source: Copernicus journal article supplement (doi:10.5194/acp-23-7859-2023), 2023-07-17
Supplement: Supplementary file 1 [file acp-23-7859-2023-supplement.pdf]

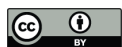

*Supplement of*

**Technical note: Improved synthetic routes to *cis*- and *trans*-(2-methyloxirane-2,3-diyl)dimethanol (*cis*- and *trans*- $\beta$ -isoprene epoxydiol)**

**Molly Frauenheim et al.**

*Correspondence to:* Avram Gold ([golda@email.unc.edu](mailto:golda@email.unc.edu))

The copyright of individual parts of the supplement might differ from the article licence.

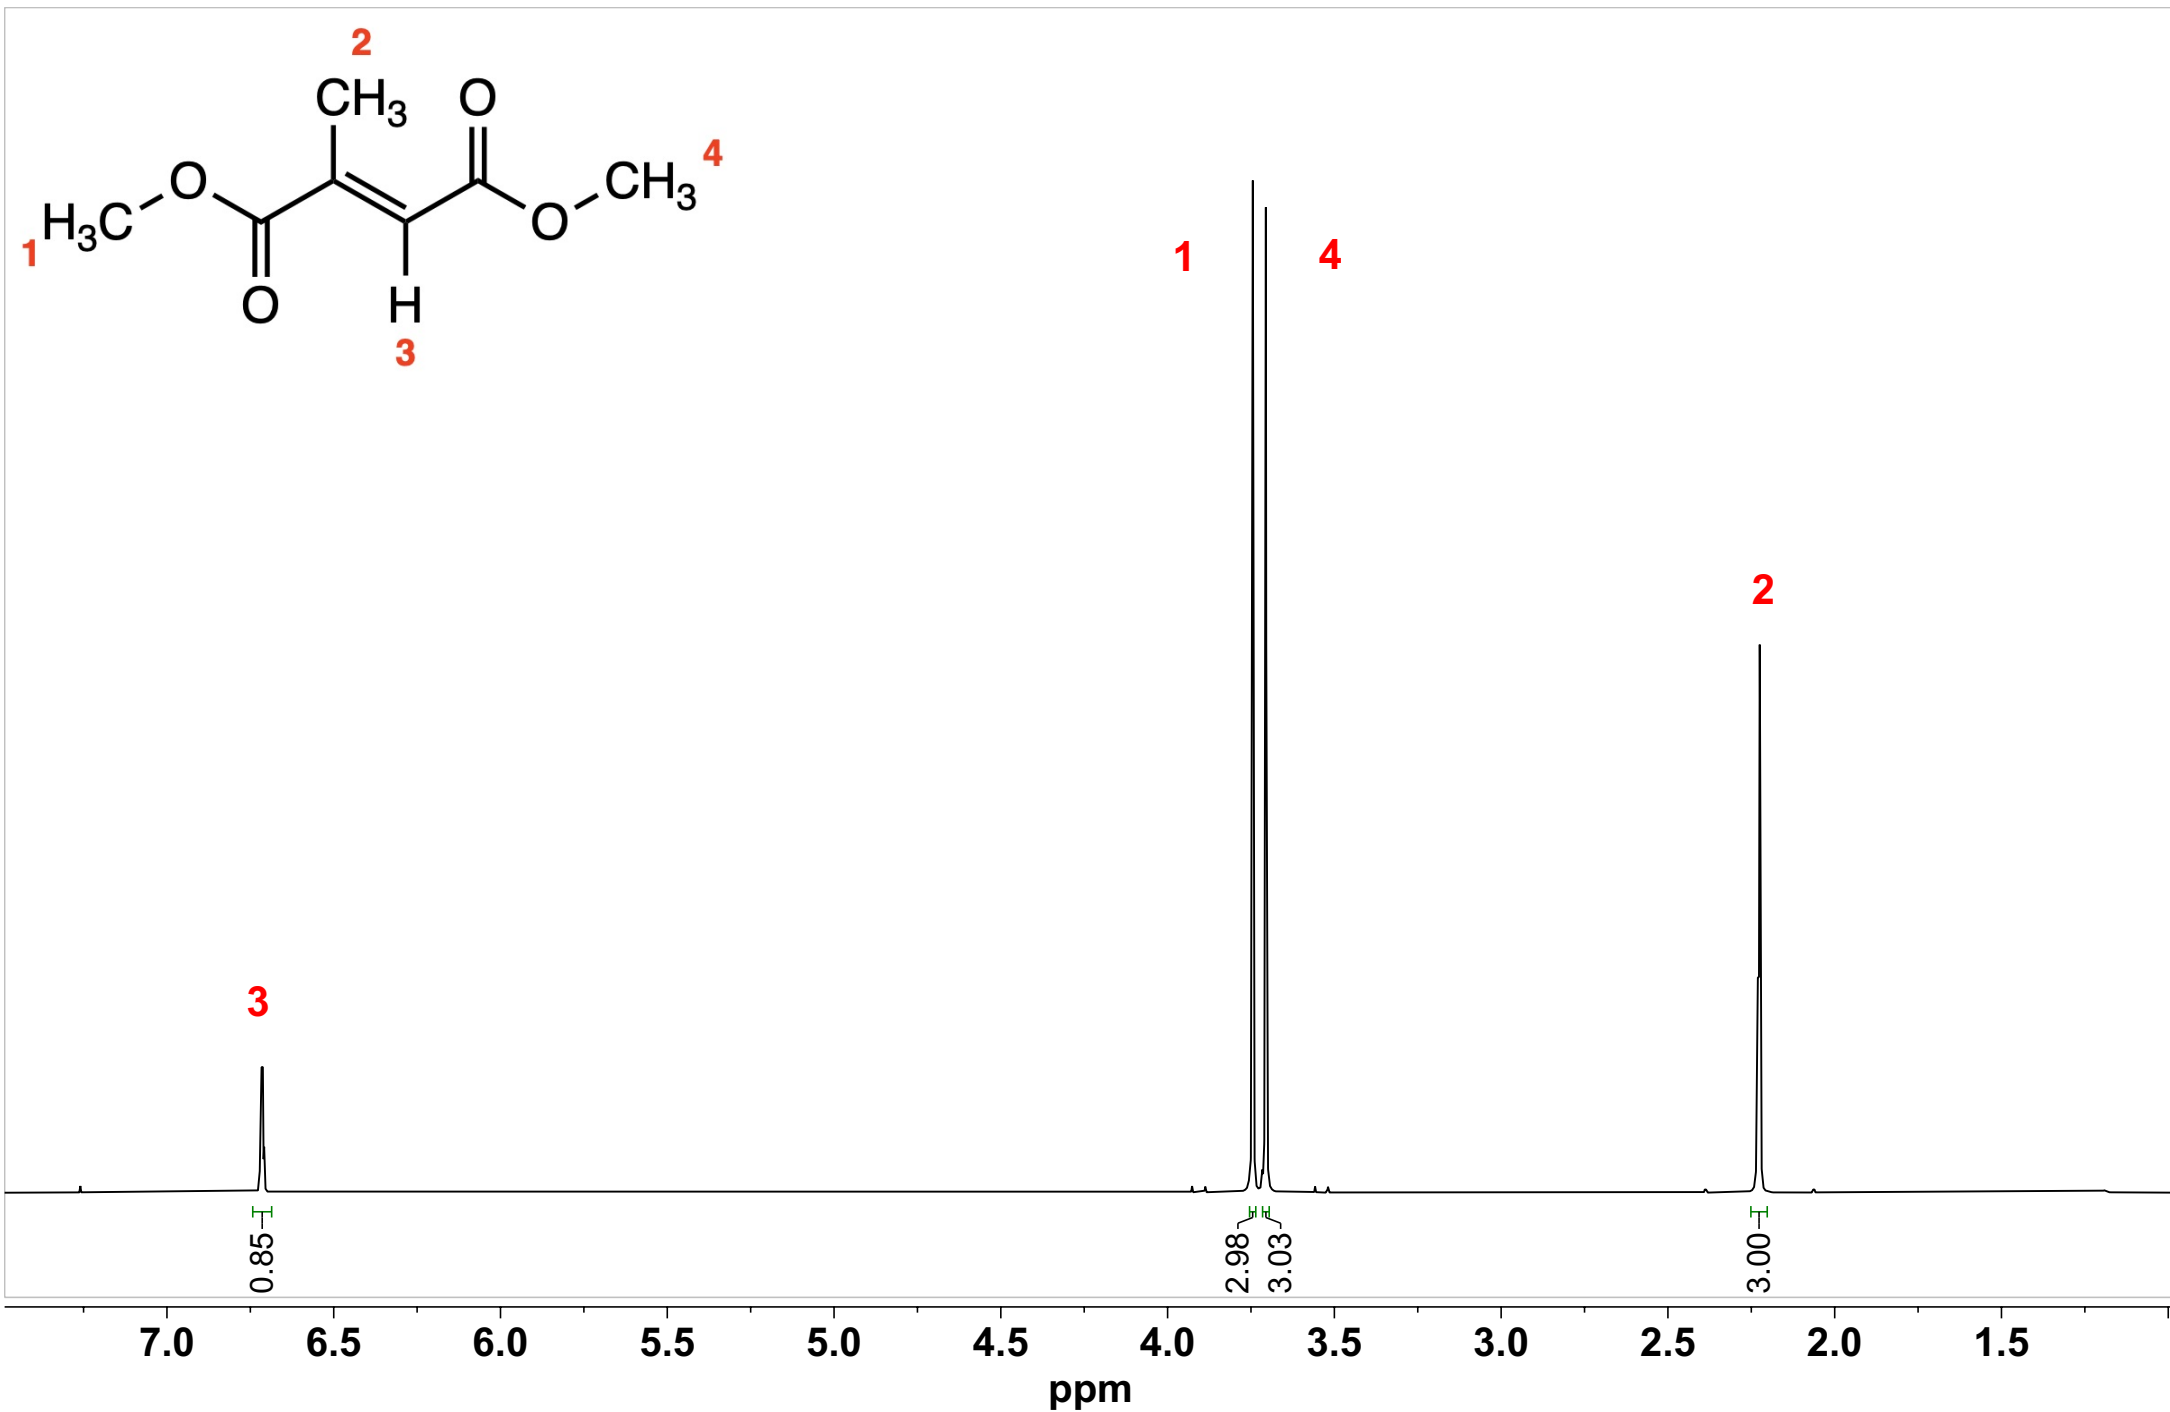

Figure S1. <sup>1</sup>H NMR (400 MHz, D<sub>2</sub>O) mesaconic acid dimethyl ester .

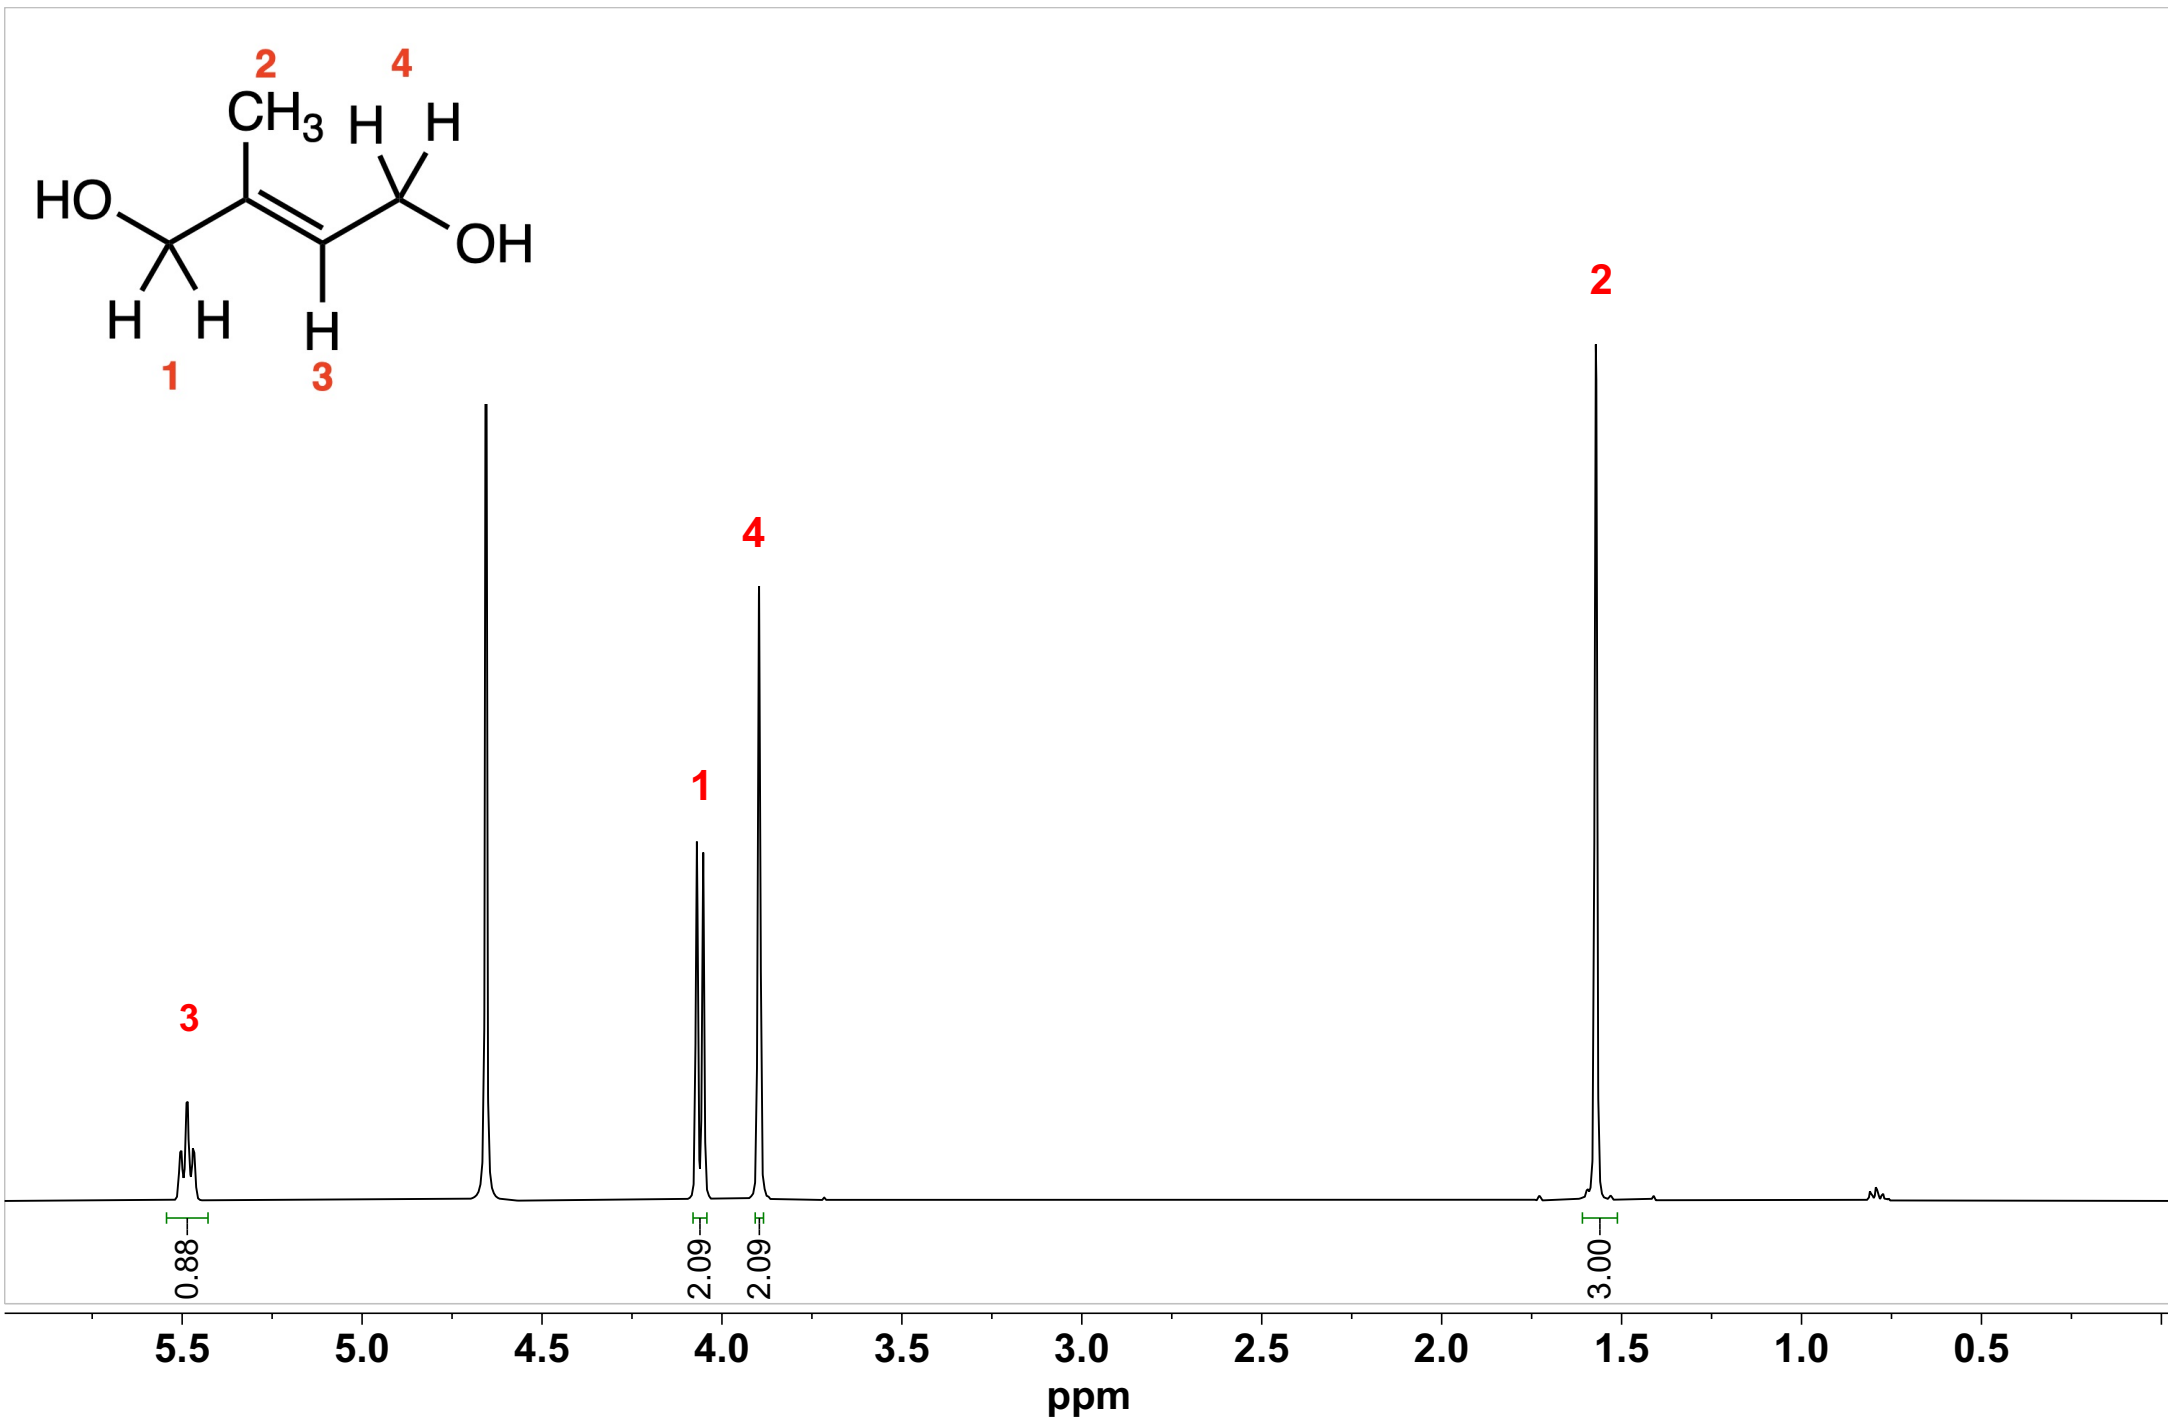

Figure S2. <sup>1</sup>H NMR (400 MHz, D<sub>2</sub>O) *E*-2-methylbut-2-ene-1,4-diol.

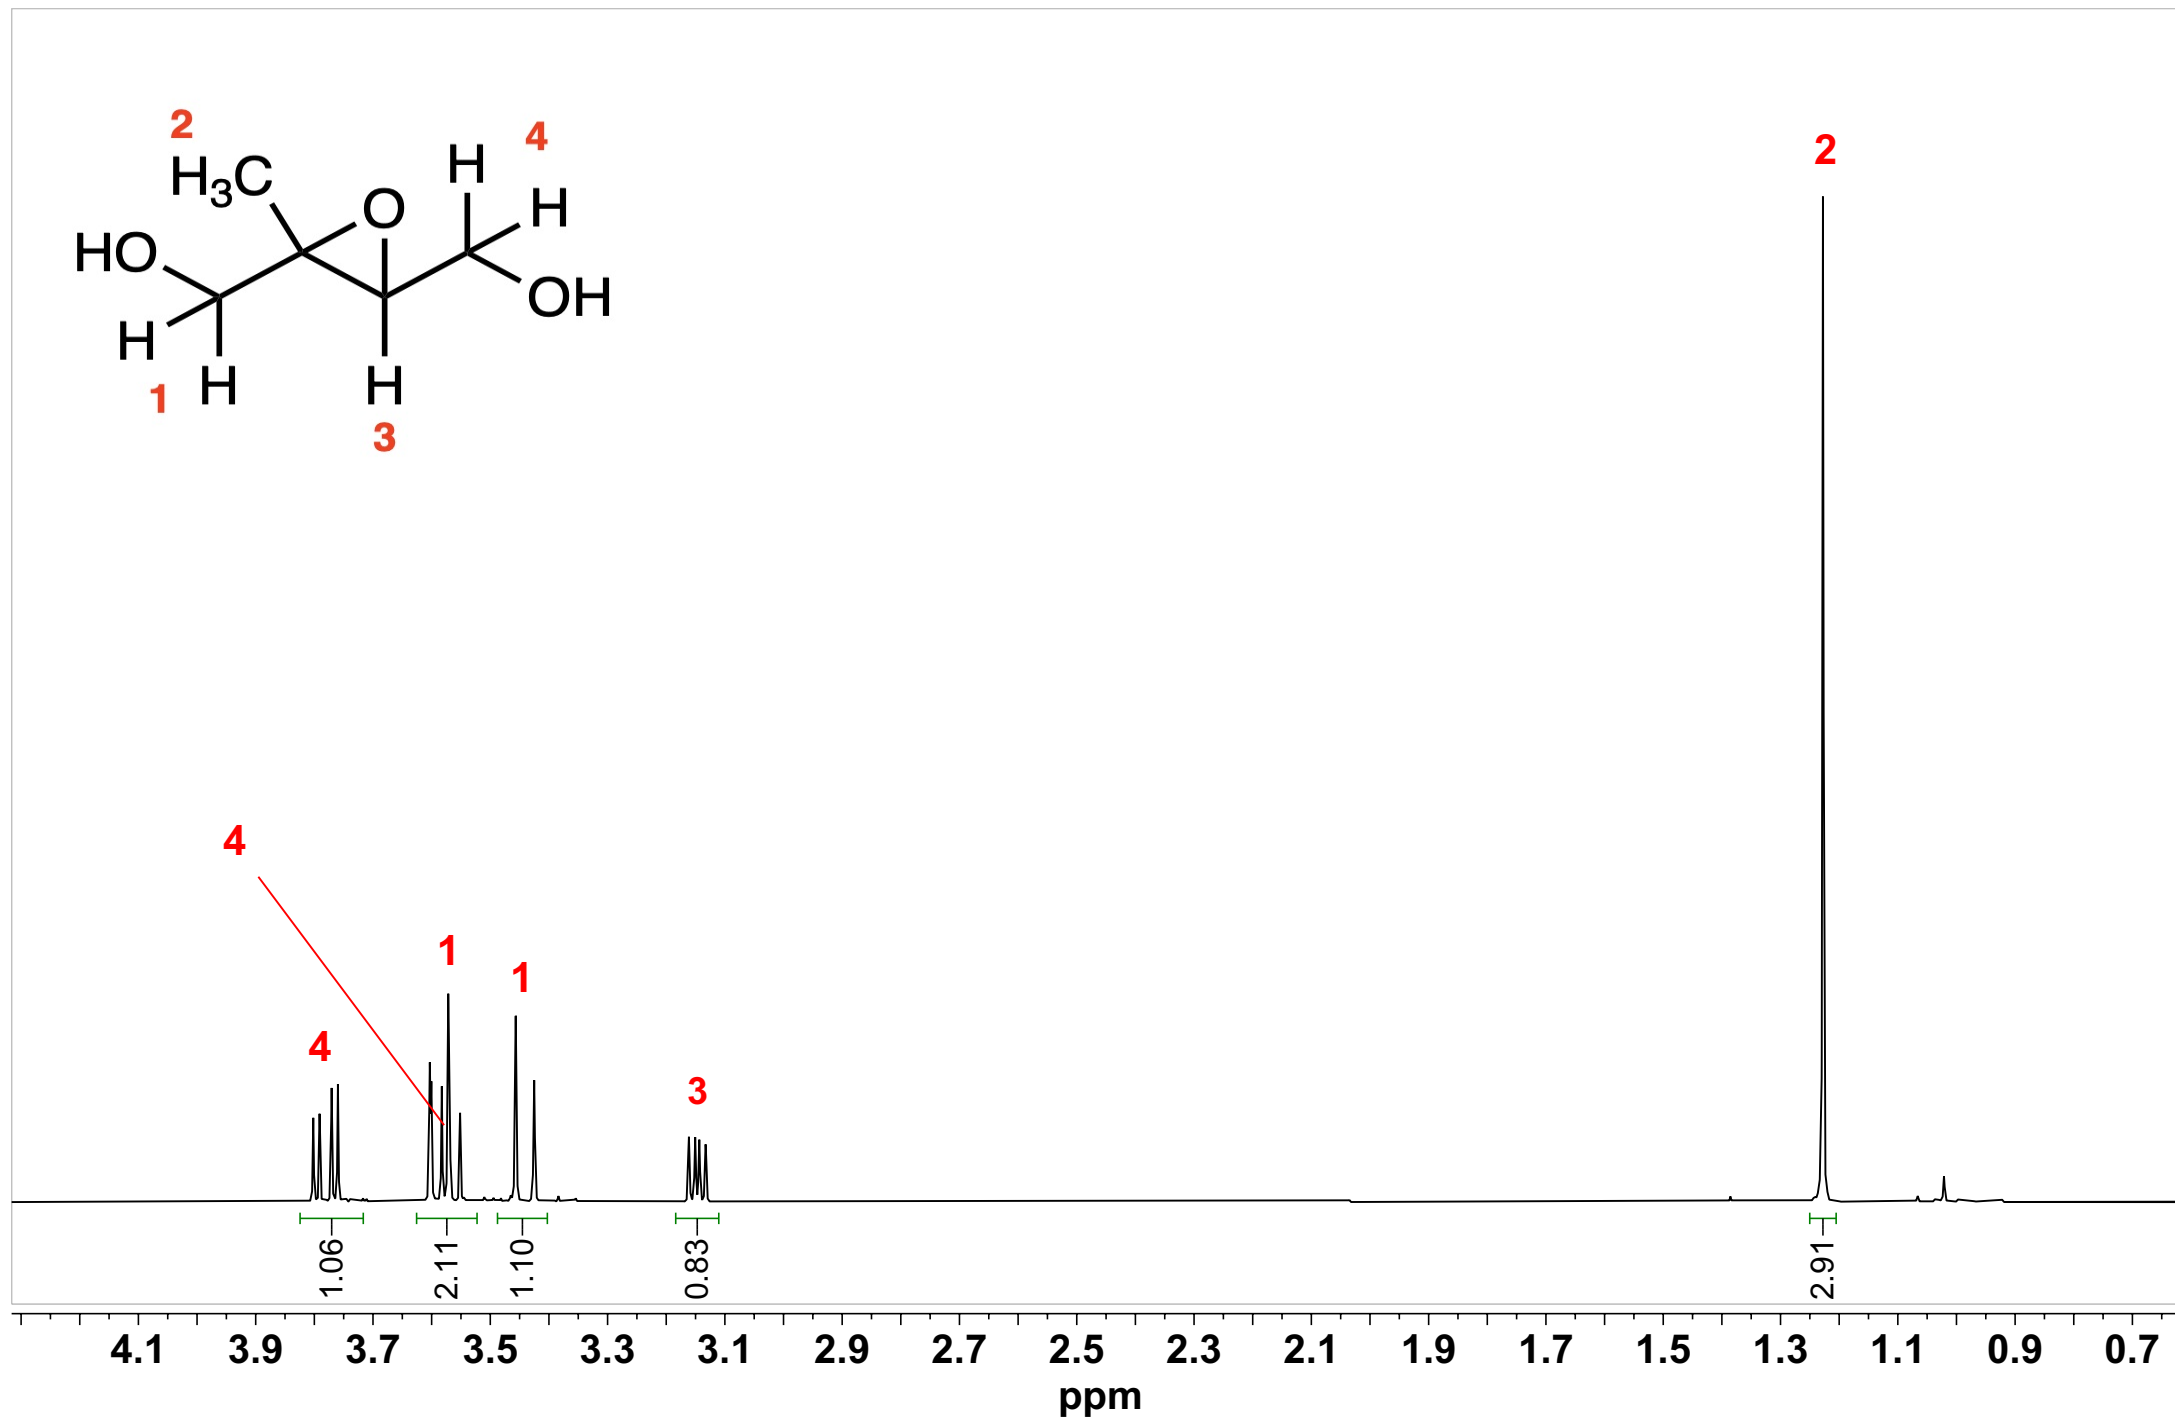

Figure S3. <sup>1</sup>H NMR (400 MHz, D<sub>2</sub>O) *trans*-(2-methyloxirane-2,3-diol)dimethanol (*trans*- $\beta$ -IEPOX).

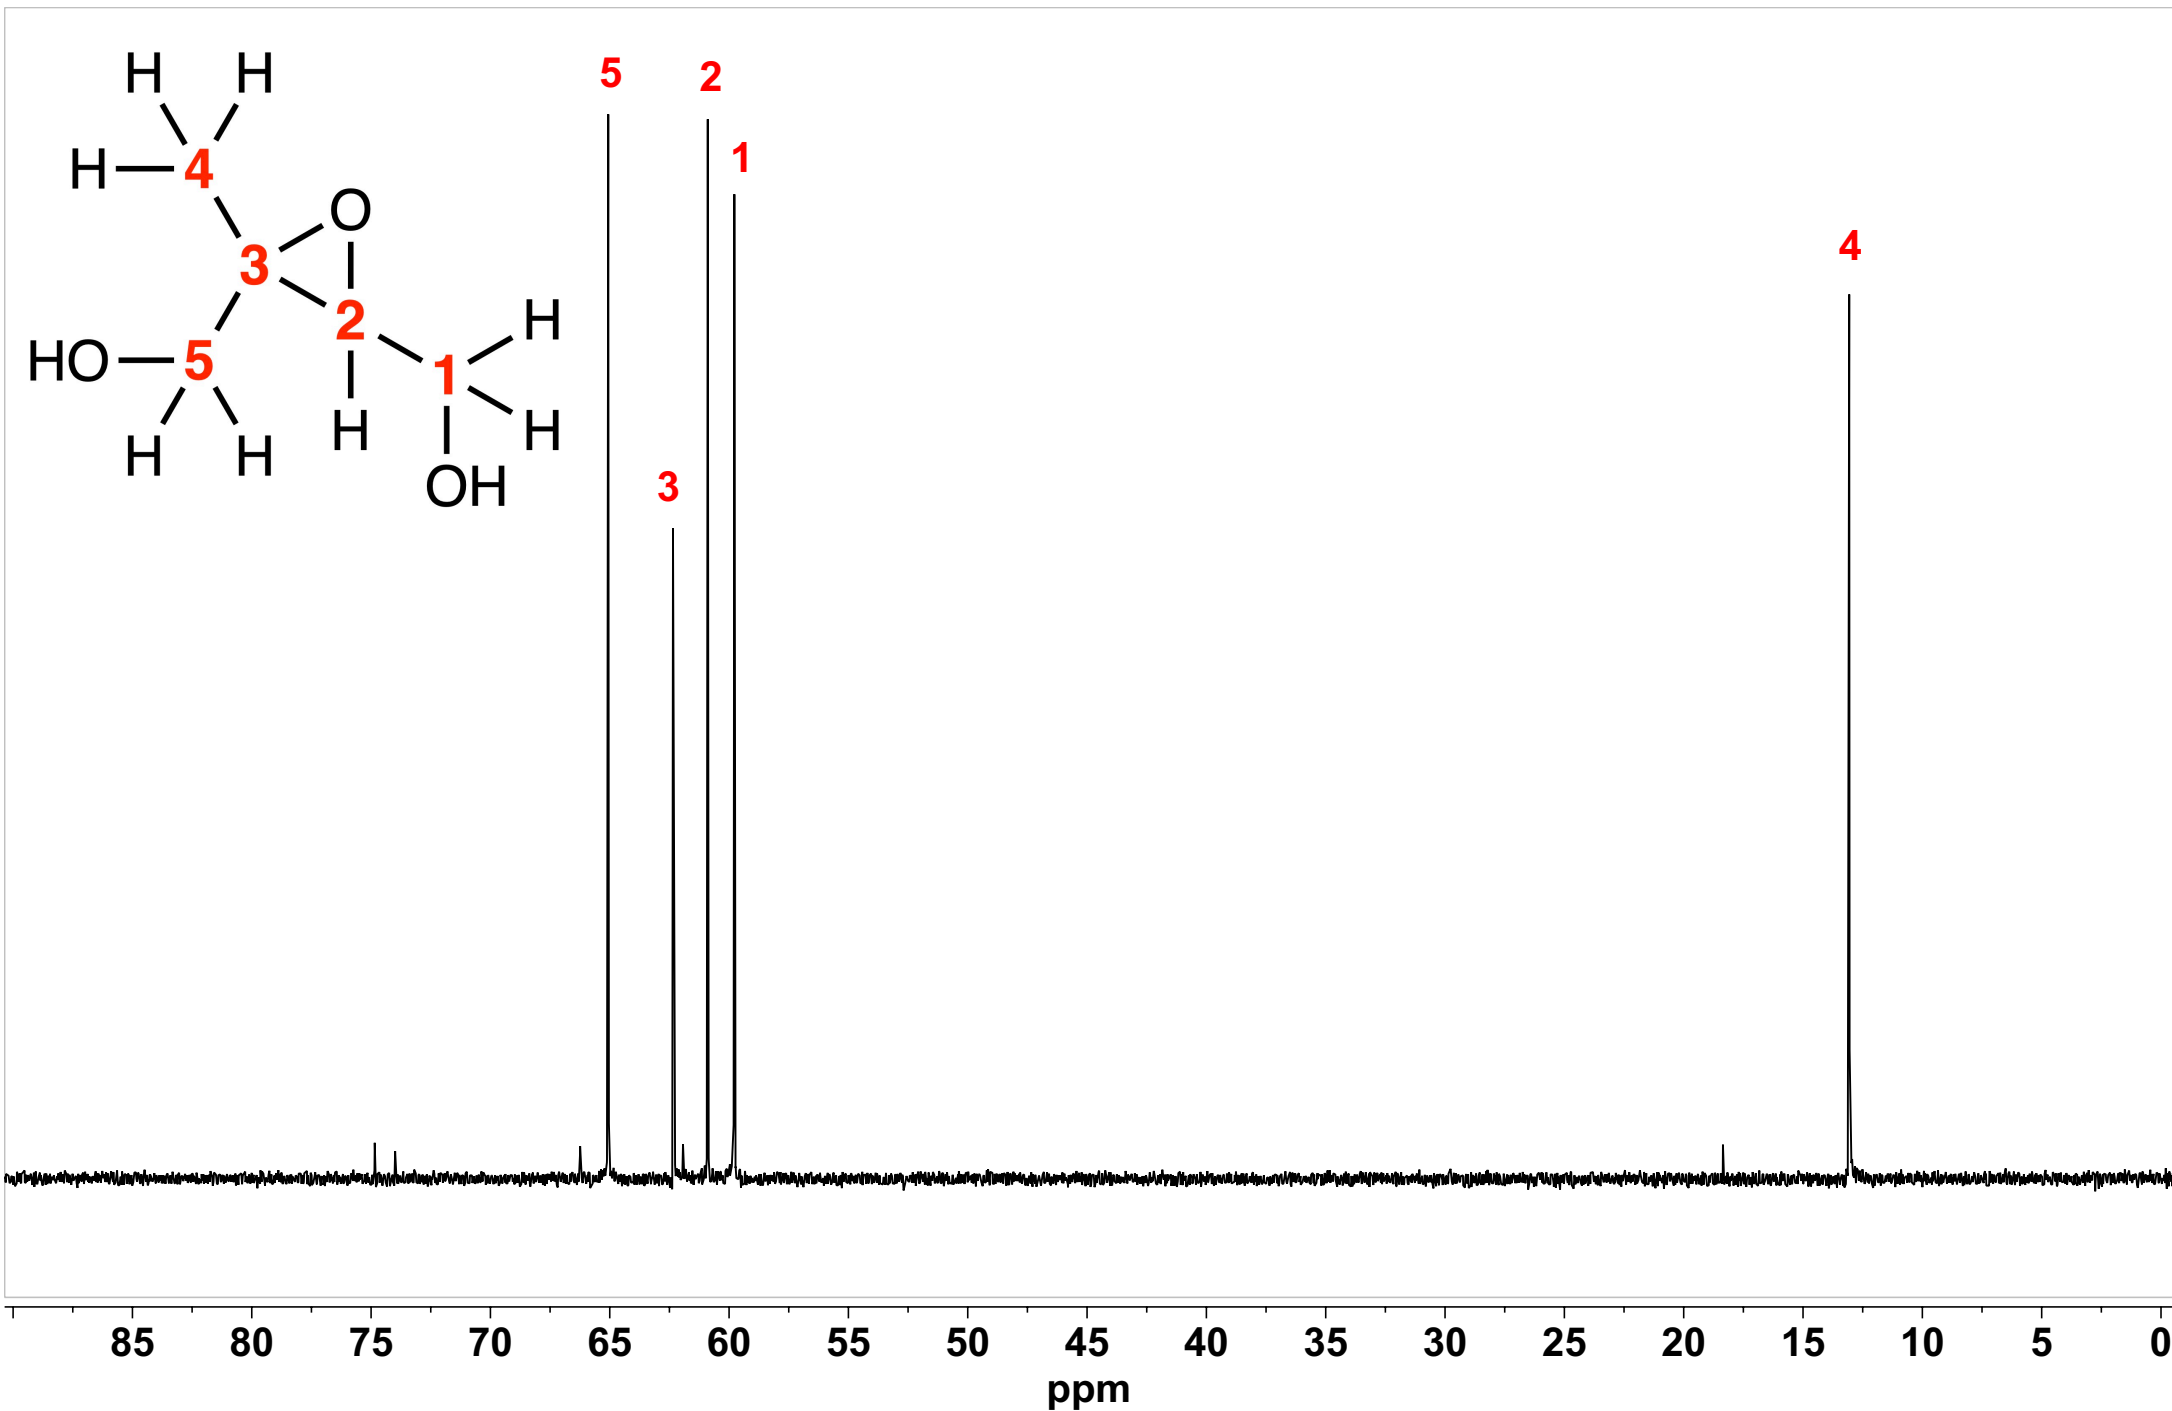

Figure S4. <sup>13</sup>C NMR (400 MHz, D<sub>2</sub>O) *trans*-(2-methyloxirane-2,3-diyl)dimethanol (*trans*-β-IEPOX).

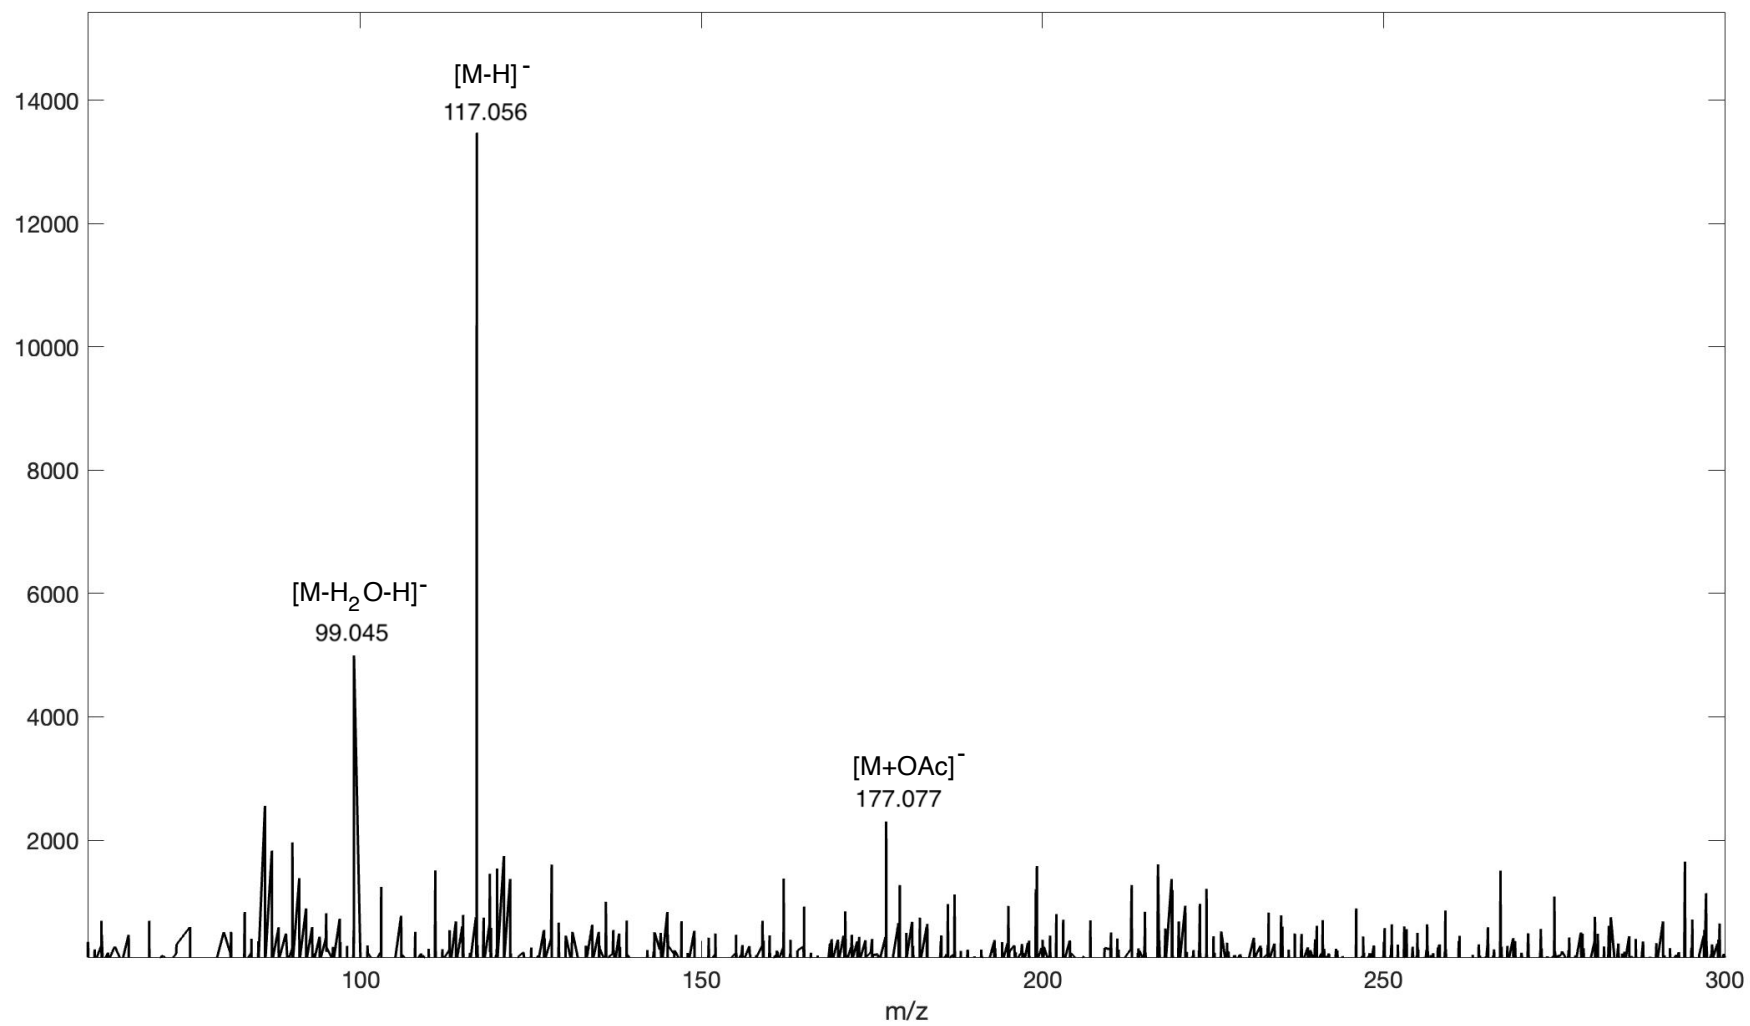

Figure S5. (-)ESI-Q-TOF-MS spectrum of *trans*- (2-methyloxirane-2,3-diyl)dimethanol (*trans*- $\beta$ -IEPOX).

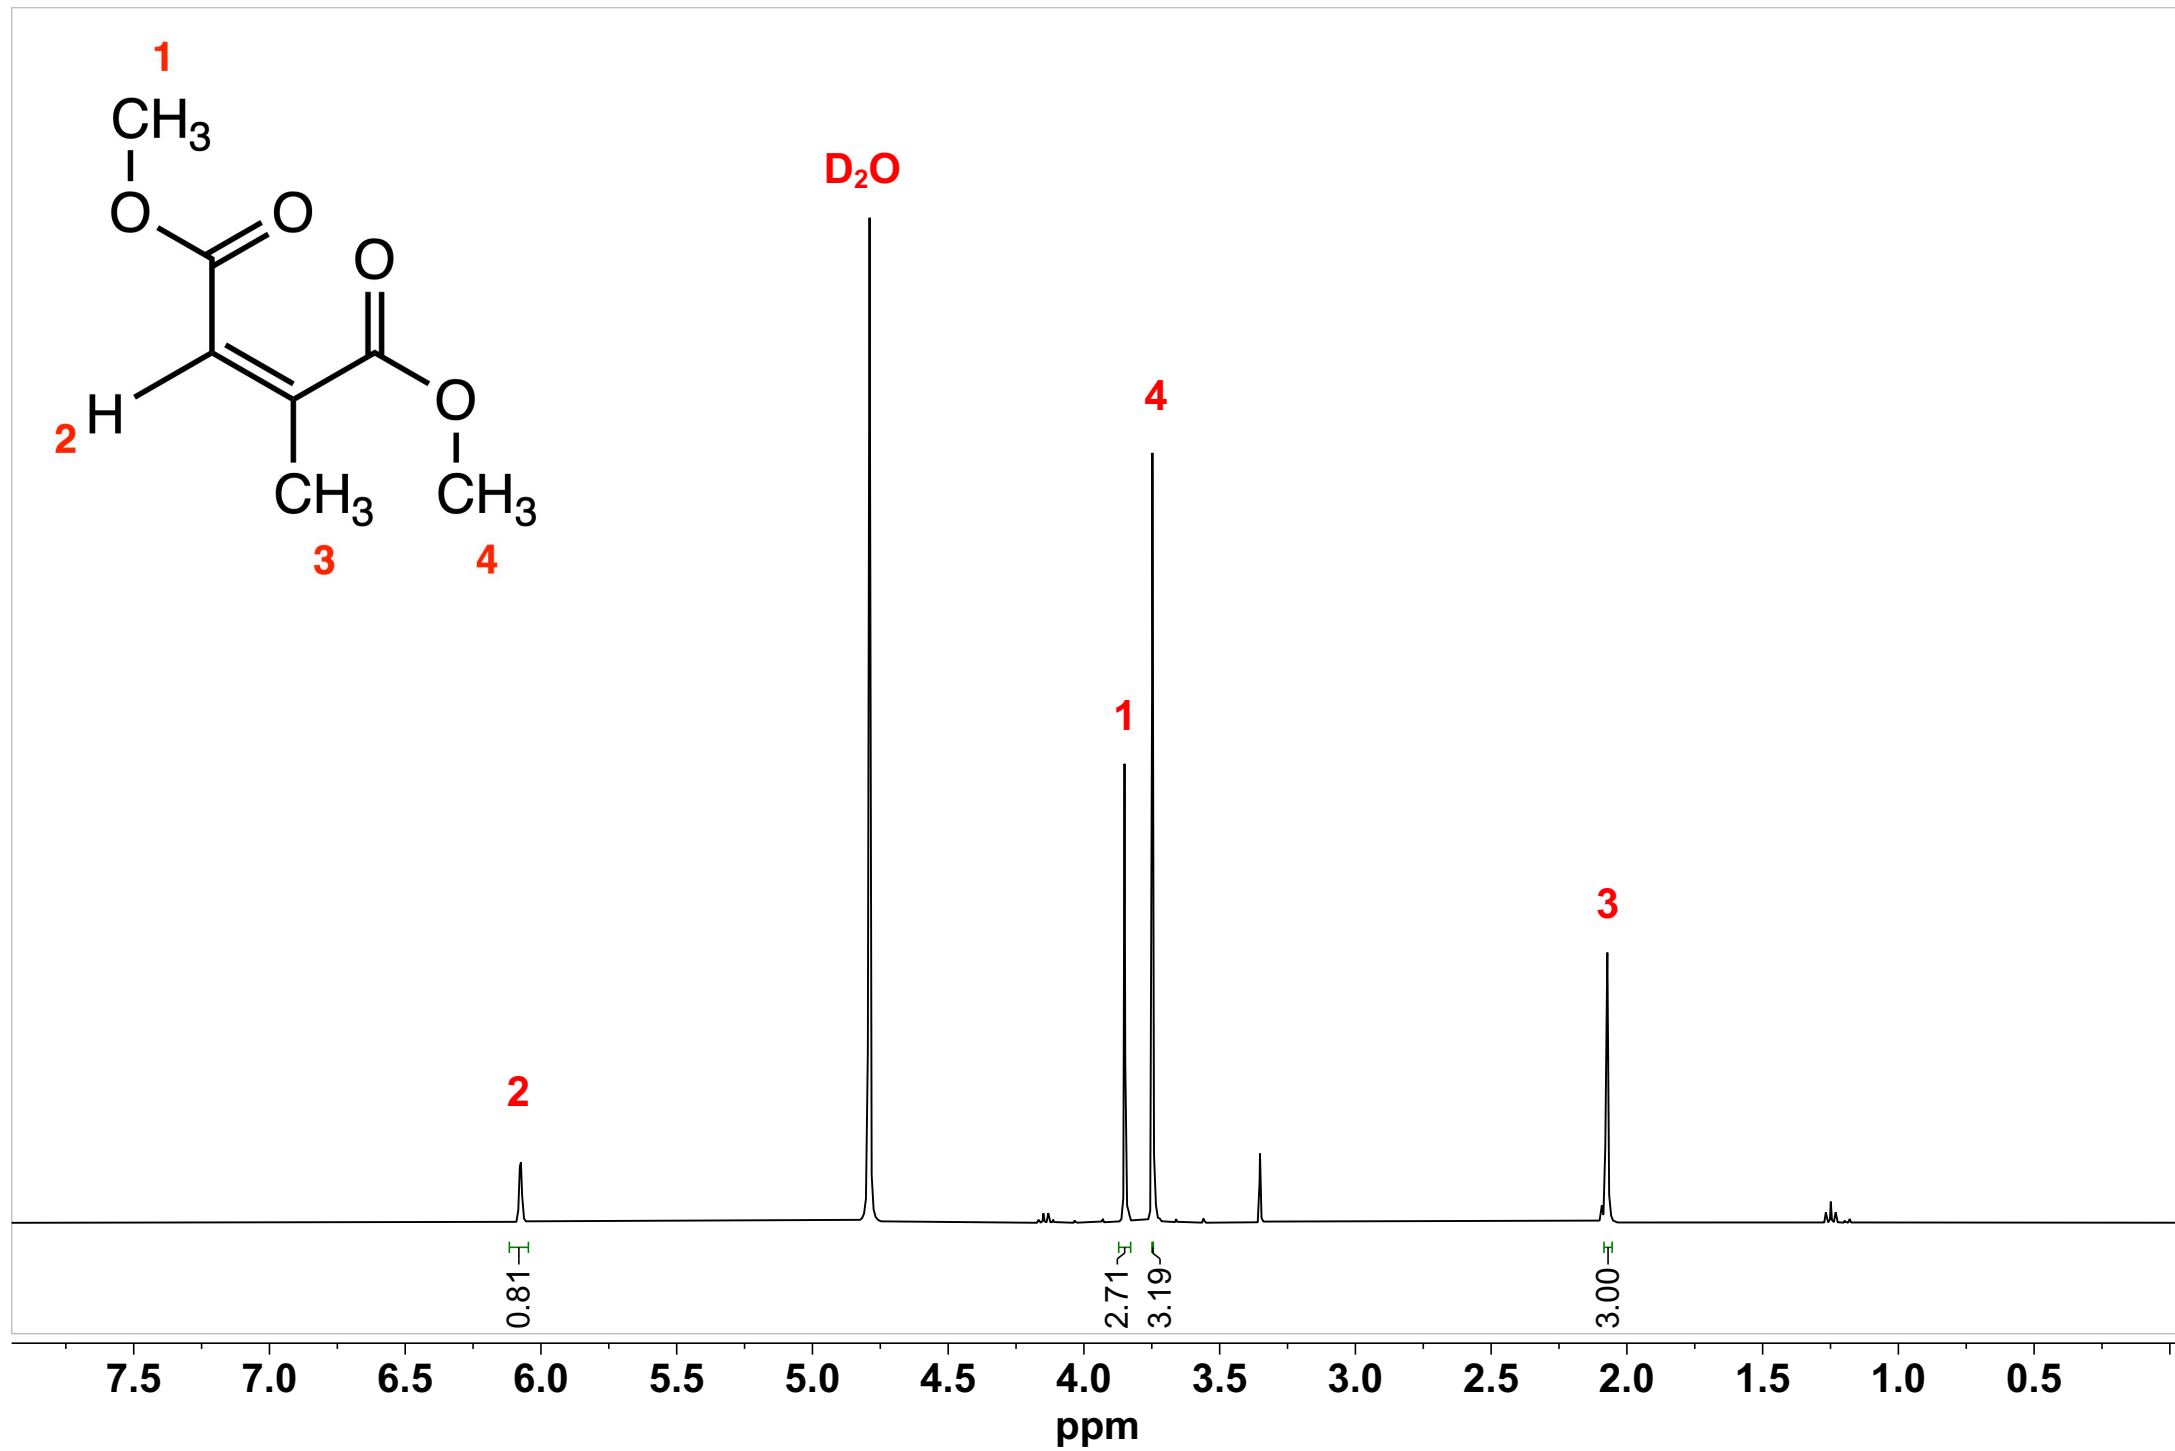

Figure S6. <sup>1</sup>H NMR (400 MHz, D<sub>2</sub>O) citraconic acid dimethyl ester .

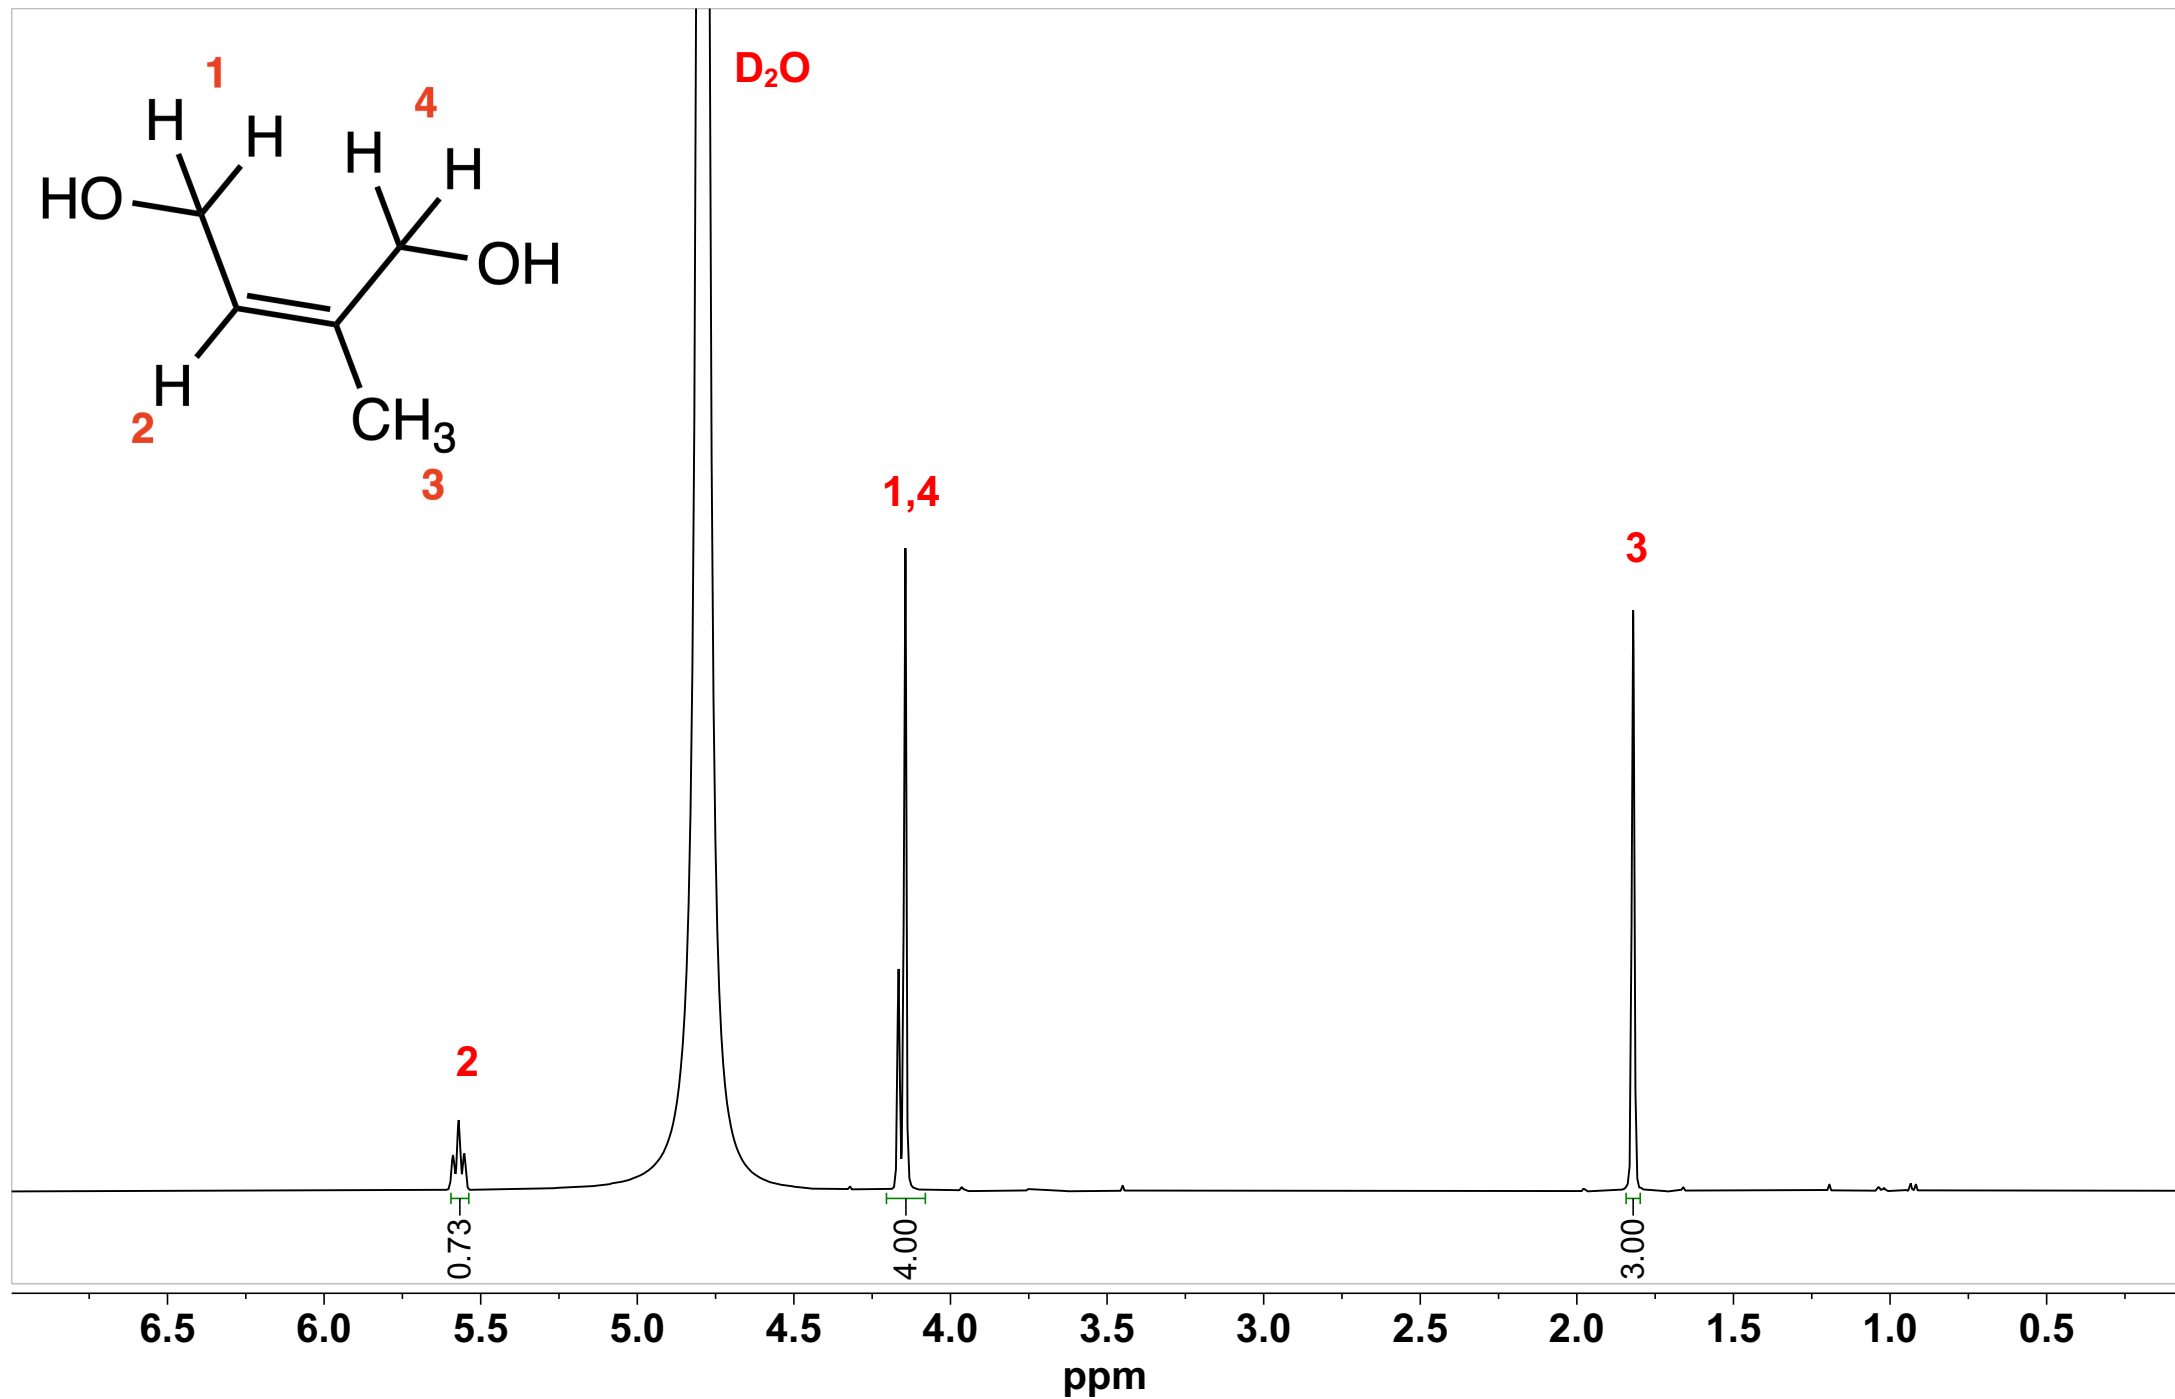

Figure S7.  $^1\text{H}$  NMR (400 MHz,  $\text{D}_2\text{O}$ ) Z-2-methylbut-2-ene-1,4-diol.



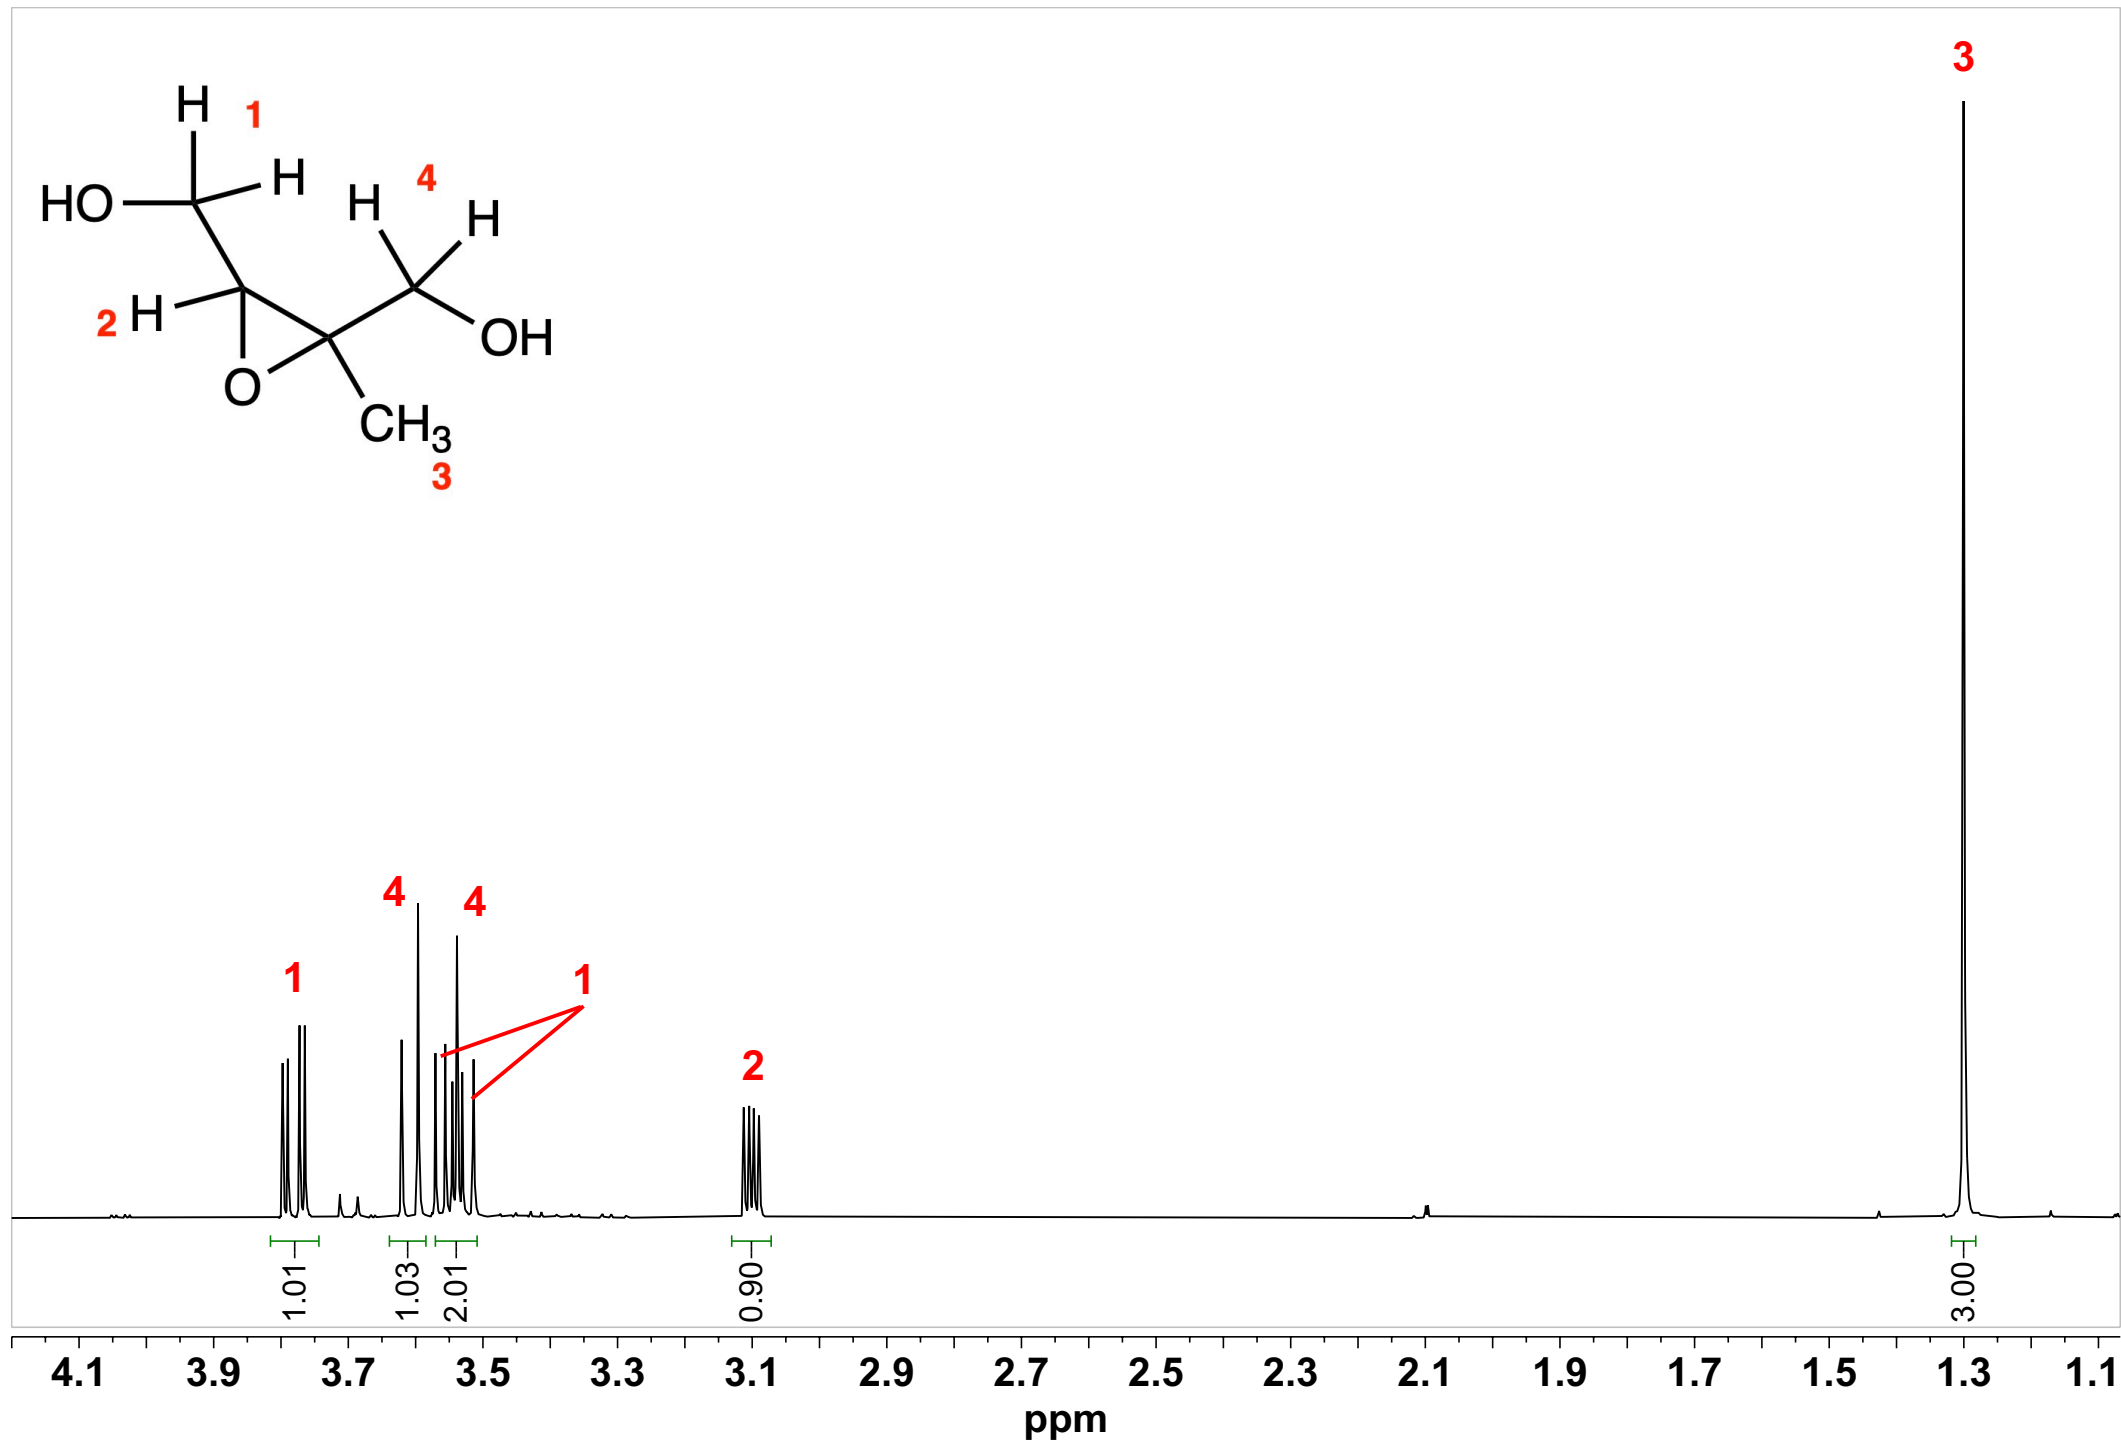

Figure S8.  $^1\text{H}$  NMR (500 MHz,  $\text{D}_2\text{O}$ ) *cis*-(2-methyloxirane-2,3-diyl)dimethanol (*cis*- $\beta$ -IEPOX).

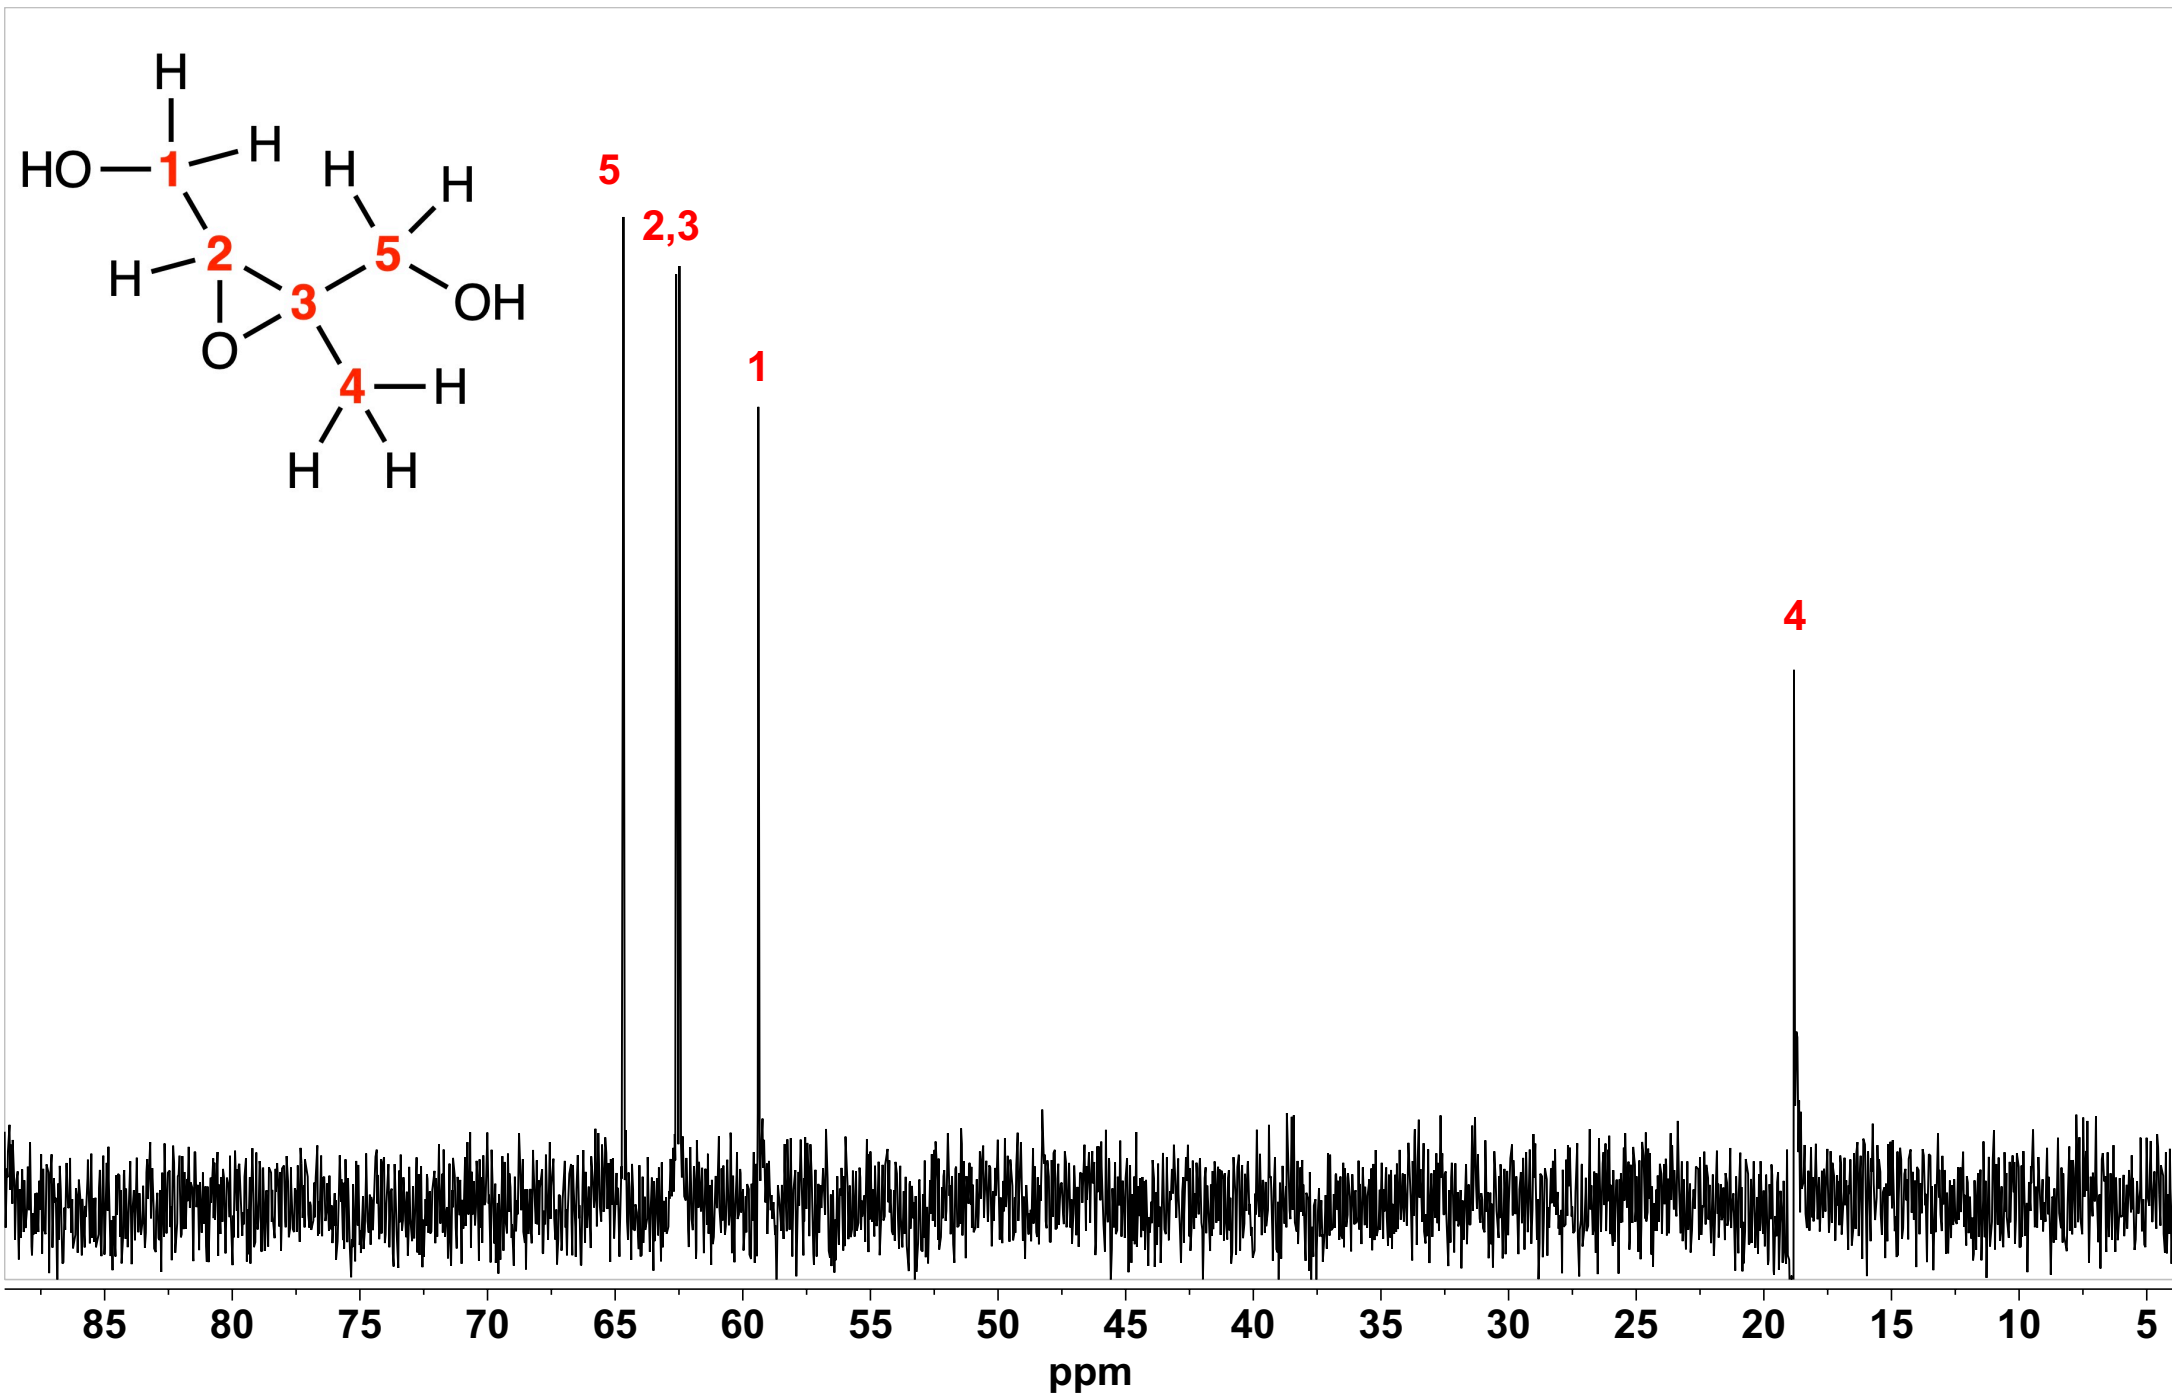

Figure S9. <sup>13</sup>C NMR (500 MHz, D<sub>2</sub>O) *cis*-(2-methyloxirane-2,3-diyl)dimethanol (*cis*-β-IEPOX).

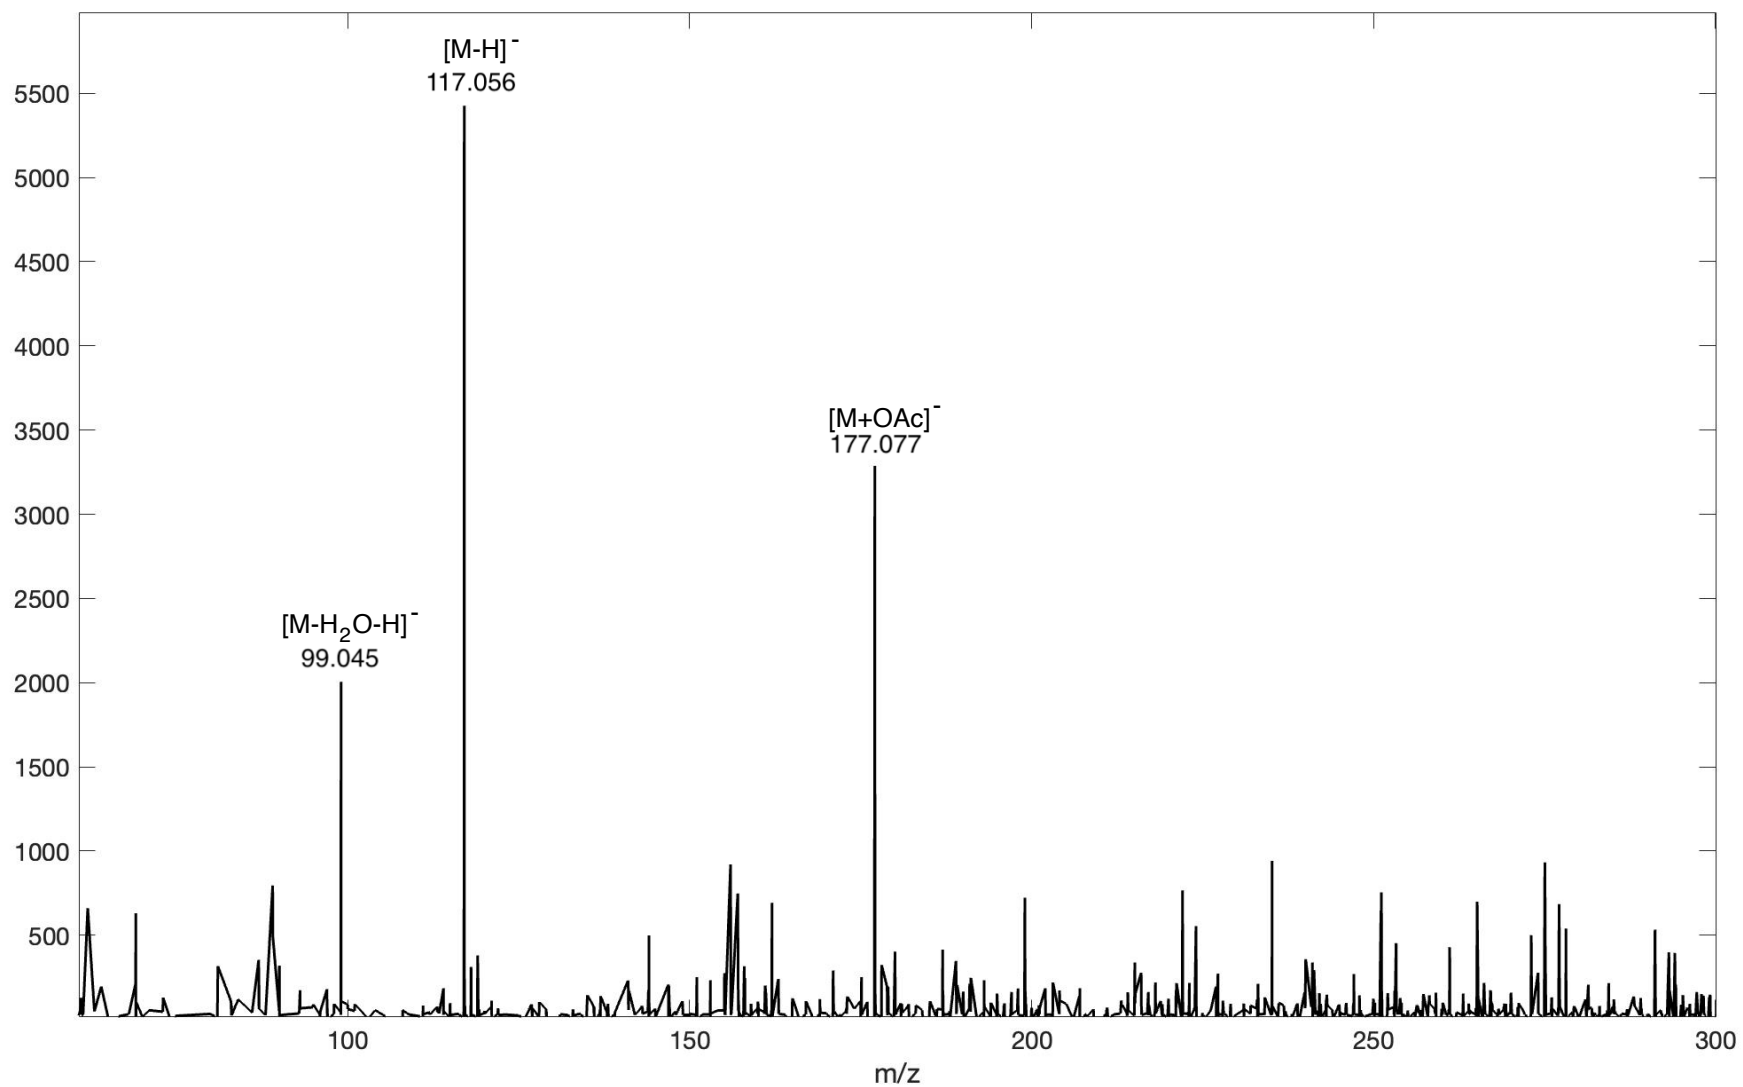

Figure S10. (-)ESI-Q-TOF-MS spectrum of *cis*-(2-methyloxirane-2,3-diyl)dimethanol (*cis*- $\beta$ -IEPOX).
